# Supplementary material for: A decline in PABPN1 induces progressive muscle weakness in Oculopharyngeal muscle dystrophy and in muscle aging
Source: publisher site journal article supplement (doi:10.18632/aging.100567), 2013-06-16
Supplement: Supplementary file [file aging-v5i6-100567-supplementary-material-SD1.pdf]

**Supplementary Table 1** – A list of muscle biopsies of OPMD patients and controls that were used for RNA expression analyses. All expPABPN1 carriers were confirmed by sequence analysis.

| Controls |     |        |     | expPABPN1 Carriers |     |            |             |     |            |
|----------|-----|--------|-----|--------------------|-----|------------|-------------|-----|------------|
| Gender   | Age | Sex    | Age | Pre-Symptomatic    |     |            | Symptomatic |     |            |
|          |     |        |     | Gender             | Age | MRC score* | Gender      | Age | MRC score* |
| Female   | 17  | Male   | 41  | Female             | 37  | 5          | Female      | 49  | 4          |
| Male     | 17  | Male   | 42  | Female             | 37  | 5          | Female      | 54  | 5          |
| Female   | 19  | Male   | 42  | Male               | 38  | 5          | Female      | 57  | 4          |
| Female   | 19  | Male   | 42  | Female             | 39  | 5          | Male        | 59  | 5          |
| Male     | 20  | Male   | 42  | Female             | 39  | 5          | Female      | 60  | 4          |
| Female   | 20  | Male   | 43  | Female             | 41  | 5          | Female      | 60  | 4.5        |
| Male     | 22  | Male   | 43  |                    |     | 5          | Male        | 66  | 4.5        |
| Male     | 23  | Female | 43  |                    |     |            | Male        | 68  | 3.5        |
| Female   | 25  | Female | 43  |                    |     |            | Female      | 69  | 4.5        |
| Female   | 27  | Female | 44  |                    |     |            |             |     |            |
| Male     | 27  | Male   | 44  |                    |     |            |             |     |            |
| Female   | 27  | Male   | 45  |                    |     |            |             |     |            |
| Male     | 28  | Female | 48  |                    |     |            |             |     |            |
| Male     | 28  | Male   | 49  |                    |     |            |             |     |            |
| Male     | 29  | Female | 49  |                    |     |            |             |     |            |
| Male     | 29  | Male   | 55  |                    |     |            |             |     |            |
| Female   | 31  | Female | 56  |                    |     |            |             |     |            |
| Female   | 31  | Female | 56  |                    |     |            |             |     |            |
| Male     | 32  | Male   | 56  |                    |     |            |             |     |            |
| Female   | 32  | Male   | 58  |                    |     |            |             |     |            |
| Female   | 32  | Female | 58  |                    |     |            |             |     |            |
| Female   | 34  | Female | 60  |                    |     |            |             |     |            |
| Female   | 34  | Female | 60  |                    |     |            |             |     |            |
| Male     | 34  | Female | 60  |                    |     |            |             |     |            |
| Female   | 35  | Male   | 60  |                    |     |            |             |     |            |
| Female   | 35  | Male   | 61  |                    |     |            |             |     |            |
| Female   | 35  | Male   | 66  |                    |     |            |             |     |            |
| Male     | 36  | Female | 67  |                    |     |            |             |     |            |
| Female   | 36  | Male   | 67  |                    |     |            |             |     |            |
| Male     | 36  | Female | 67  |                    |     |            |             |     |            |
| Female   | 37  | Female | 67  |                    |     |            |             |     |            |
| Female   | 38  | Male   | 68  |                    |     |            |             |     |            |
| Male     | 39  | Female | 70  |                    |     |            |             |     |            |
| Female   | 39  | Male   | 70  |                    |     |            |             |     |            |
| Male     | 39  | Male   | 73  |                    |     |            |             |     |            |
| Male     | 40  | Male   | 77  |                    |     |            |             |     |            |
| Male     | 40  | Female | 85  |                    |     |            |             |     |            |
| Male     | 40  | Female | 87  |                    |     |            |             |     |            |
| Female   | 40  | Female | 89  |                    |     |            |             |     |            |

\* MRC score in left and right quadriceps was determined at the same day when biopsies were sampled. Values show an average of both sides. MRC in age-matching controls and in pre-symptomatic is 5, indicating normal muscle strength; <5 indicates clinical muscle weakness.

Supplementary Table 2 - Functional Analysis of ageing and OPMD associated transcriptional changes. Biological processes are defined and clustered according to KEGG. The proportion of deregulated genes are depicted by %D.E. Genes.

|                                       |                                                | Muscle Ageing              |          |              |         |          |              | OPMD, Anvar et al. (2011) |              |         |          |              |            |          |              |
|---------------------------------------|------------------------------------------------|----------------------------|----------|--------------|---------|----------|--------------|---------------------------|--------------|---------|----------|--------------|------------|----------|--------------|
|                                       |                                                | Human, Welle et al. (2004) |          |              | Human   |          |              | Human                     |              | Mouse   |          |              | Drosophila |          |              |
|                                       |                                                | # Genes                    | P-value  | % D.E. Genes | # Genes | P-value  | % D.E. Genes | P-value                   | % D.E. Genes | # Genes | P-value  | % D.E. Genes | # Genes    | P-value  | % D.E. Genes |
| <b>Metabolism</b>                     |                                                |                            |          |              |         |          |              |                           |              |         |          |              |            |          |              |
| Carbohydrate                          | 620 Pyruvate metabolism                        | 41                         | 1.13E-07 | 36.59        | 40      | 1.24E-04 | 37.50        | -                         |              | 50      | 6.26E-09 | 32.00        | 43         | 6.75E-04 | 25.58        |
|                                       | 51 Fructose and mannose metabolism             | 35                         | 3.02E-03 | 20.00        | 35      | 2.11E-04 | 48.57        | 2.28E-02                  | 28.57        | 40      | 1.18E-10 | 37.50        | 31         | 9.43E-04 | 16.13        |
|                                       | 562 Inositol phosphate metabolism              | 49                         | 3.12E-02 | 16.33        | 47      | 8.22E-04 | 31.91        | 2.98E-03                  | 17.02        | 63      | 2.37E-07 | 31.75        | 32         | 1.89E-03 | 21.88        |
| Energy                                | 190 Oxidative phosphorylation                  | 112                        | 1.87E-05 | 54.46        | 108     | 7.87E-03 | 28.70        | 1.37E-02                  | 17.59        | 123     | 4.63E-06 | 32.52        | 97         | 6.17E-04 | 49.48        |
|                                       | 910 Nitrogen metabolism                        | 24                         | 6.76E-05 | 25.00        | 24      | 2.79E-02 | 50.00        | 1.13E-02                  | 20.83        | 23      | 1.23E-11 | 43.48        | 27         | 1.21E-03 | 22.22        |
| Lipid                                 | 564 Glycerophospholipid metabolism             | 67                         | 3.39E-03 | 19.40        | 64      | 5.03E-07 | 48.44        | 1.67E-03                  | 18.75        | 67      | 8.17E-09 | 35.82        | 113        | 8.84E-04 | 11.50        |
|                                       | 1030 Glycan structures - biosynthesis 1        | 118                        | 8.77E-03 | 23.73        | 106     | 4.30E-03 | 37.74        | 3.27E-03                  | 14.15        | 137     | 2.54E-07 | 31.39        | 49         | 4.87E-02 | 12.24        |
|                                       | 590 Arachidonic acid metabolism                | 54                         | 1.28E-02 | 14.81        | 50      | 2.94E-04 | 40.00        | 1.46E-02                  | 18.00        | 69      | 3.74E-11 | 24.64        | -          |          |              |
| Nucleotide                            | 230 Purine metabolism                          | 145                        | 5.06E-04 | 23.45        | 139     | 5.59E-05 | 43.88        | 5.47E-03                  | 28.78        | 164     | 3.14E-08 | 35.37        | 246        | 9.39E-04 | 21.14        |
|                                       | 240 Pyrimidine metabolism                      | 89                         | 1.56E-03 | 20.22        | 86      | 1.14E-03 | 36.05        | 1.94E-02                  | 22.09        | 104     | 2.05E-08 | 36.54        | 68         | 1.33E-03 | 14.71        |
| Amino Acid                            | 260 Glycine, serine and threonine metabolism   | 42                         | 3.58E-06 | 23.81        | 39      | 1.28E-03 | 30.77        | 4.38E-02                  | 20.51        | 46      | 5.92E-08 | 23.91        | 34         | 6.36E-04 | 17.65        |
|                                       | 251 Glutamate metabolism                       | 24                         | 1.06E-04 | 29.17        | 23      | 4.15E-03 | 47.83        | 4.15E-02                  | 17.39        | 27      | 4.65E-09 | 40.74        | 26         | 1.25E-03 | 34.62        |
|                                       | 271 Methionine metabolism                      | 21                         | 1.44E-02 | 28.57        | 20      | 1.19E-02 | 40.00        | 4.27E-02                  | 25.00        | 22      | 4.71E-08 | 59.09        | -          |          |              |
| Glycan Biosynthesis                   | 1032 Glycan structures - degradation           | 31                         | 2.53E-02 | 22.58        | 29      | 1.69E-02 | 37.93        | 3.01E-03                  | 24.14        | 31      | 2.61E-07 | 29.03        | -          |          |              |
| Cofactors and Vitamins                | 760 Nicotinate and nicotinamide metabolism     | 23                         | 1.74E-06 | 34.78        | 23      | 2.19E-04 | 56.52        | 6.21E-03                  | 34.78        | 25      | 1.05E-06 | 32.00        | 8          | 2.74E-03 | 12.50        |
| <b>Genetic Information Processing</b> |                                                |                            |          |              |         |          |              |                           |              |         |          |              |            |          |              |
| Transcription                         | 3020 RNA polymerase                            | 25                         | 9.28E-04 | 28.00        | 22      | 3.94E-04 | 36.36        | 2.11E-02                  | 27.27        | 31      | 1.21E-06 | 32.26        | 19         | 1.14E-03 | 21.05        |
| Translation                           | 970 Aminoacyl-tRNA biosynthesis                | 41                         | 1.19E-03 | 24.39        | -       |          |              | 1.23E-02                  | 28.95        | 53      | 2.34E-06 | 35.85        | 26         | 2.92E-03 | 23.08        |
|                                       | 3010 Ribosome                                  | -                          |          |              | 83      | 5.86E-03 | 37.35        | -                         |              | 67      | 1.73E-08 | 37.31        | 78         | 6.99E-04 | 53.85        |
| Folding, Sorting and Degradation      | 3050 Proteasome                                | 43                         | 4.67E-04 | 32.56        | -       |          |              | 9.27E-03                  | 34.09        | 52      | 3.72E-06 | 30.77        | 42         | 7.71E-04 | 57.14        |
|                                       | 4120 Ubiquitin mediated proteolysis            | 131                        | 1.64E-03 | 27.48        | 126     | 5.41E-06 | 45.24        | 1.52E-03                  | 30.16        | 177     | 3.61E-10 | 38.98        | 80         | 8.66E-04 | 21.25        |
|                                       | 4130 SNARE interactions in vesicular transport | 37                         | 1.88E-03 | 27.03        | 38      | 5.83E-03 | 34.21        | 3.54E-02                  | 26.32        | 36      | 2.86E-09 | 50.00        | 22         | 3.38E-02 | 9.09         |
| Replication and Repair                | 3030 DNA replication                           | 36                         | 1.40E-03 | 33.33        | 34      | 1.25E-03 | 41.18        | 1.54E-02                  | 23.53        | 38      | 2.97E-08 | 42.11        | 28         | 1.02E-03 | 14.29        |
|                                       | 3420 Nucleotide excision repair                | 43                         | 2.87E-02 | 18.60        | 41      | 1.56E-03 | 36.59        | 8.88E-04                  | 24.39        | 43      | 3.36E-10 | 53.49        | 33         | 1.06E-03 | 24.24        |

## Environmental Information Processing

|                                     |                                 |                                            |          |          |          |          |          |          |          |          |          |          |          |               |          |       |
|-------------------------------------|---------------------------------|--------------------------------------------|----------|----------|----------|----------|----------|----------|----------|----------|----------|----------|----------|---------------|----------|-------|
| Membrane Transport                  | 2010 ABC transporters - General | 41                                         | 8.85E-03 | 24.39    | 44       | 2.06E-04 | 43.18    | 4.08E-03 | 25.00    | 41       | 5.22E-09 | 39.02    | 3        | 3.81E-02      | 66.67    |       |
|                                     | 4330 Notch signaling pathway    | 46                                         | 1.12E-05 | 41.30    |          | -        |          | 2.81E-03 | 18.60    | 49       | 2.70E-08 | 22.45    | 21       | 6.99E-03      | 19.05    |       |
|                                     | 4150 mTOR signaling pathway     | 50                                         | 2.39E-05 | 42.00    | 49       | 1.92E-03 | 44.90    | 1.71E-02 | 28.57    | 64       | 3.78E-08 | 39.06    | 23       | 7.76E-04      | 34.78    |       |
|                                     | 4370 VEGF signaling pathway     | 73                                         | 1.68E-03 | 23.29    | 67       | 2.48E-06 | 43.28    | 5.52E-03 | 20.90    | 82       | 8.69E-11 | 40.24    | 32       | 7.22E-04      | 31.25    |       |
|                                     | 4010 MAPK signaling pathway     | 265                                        | 1.91E-03 | 24.91    | 253      | 7.50E-05 | 39.13    | 5.50E-03 | 18.18    | 283      | 1.49E-10 | 33.92    |          | not available |          |       |
|                                     | 4012 ErbB signaling pathway     | 87                                         | 1.97E-03 | 27.59    | 83       | 3.14E-06 | 33.73    | 2.33E-02 | 27.71    | 107      | 2.21E-09 | 35.51    | 26       | 1.31E-03      | 34.62    |       |
|                                     | Signal Transduction             | 4310 Wnt signaling pathway                 | 148      | 4.43E-03 | 25.68    | 147      | 1.47E-04 | 39.46    | 7.60E-04 | 21.09    | 171      | 1.78E-10 | 35.09    | 64            | 8.77E-04 | 23.44 |
|                                     |                                 | 4350 TGF-beta signaling pathway            | 83       | 7.54E-03 | 25.30    | 82       | 8.16E-05 | 39.02    | 9.51E-03 | 26.83    | 84       | 1.70E-10 | 38.10    | 29            | 1.36E-02 | 17.24 |
|                                     |                                 | 4340 Hedgehog signaling pathway            | 53       | 1.95E-02 | 16.98    | 56       | 3.30E-02 | 26.79    | 3.69E-03 | 16.07    | 56       | 7.04E-09 | 21.43    | 18            | 1.15E-03 | 33.33 |
|                                     |                                 | 4070 Phosphatidylinositol signaling system | 76       | 2.16E-02 | 18.42    | 75       | 4.29E-03 | 34.67    | 3.44E-03 | 20.00    | 94       | 3.85E-10 | 34.04    | 45            | 2.64E-03 | 13.33 |
| 4630 Jak-STAT signaling pathway     |                                 | 150                                        | 2.24E-02 | 19.33    | 145      | 3.92E-05 | 39.31    | 5.59E-03 | 19.31    | 170      | 7.91E-09 | 25.29    | 20       | 1.80E-03      | 35.00    |       |
| 4020 Calcium signaling pathway      | 176                             | 4.28E-02                                   | 21.59    | 169      | 3.05E-04 | 41.42    | 1.36E-03 | 18.34    | 220      | 6.19E-10 | 26.36    | 43       | 6.54E-04 | 32.56         |          |       |
| Signaling Molecules and Interaction | 4512 ECM-receptor interaction   | 84                                         | 3.93E-02 | 20.24    | 79       | 5.33E-03 | 43.04    | 5.01E-04 | 27.85    | 97       | 1.72E-05 | 31.96    |          | not available |          |       |

## Cellular Processes

|                          |                                       |     |          |       |     |          |       |          |       |     |          |       |    |               |       |
|--------------------------|---------------------------------------|-----|----------|-------|-----|----------|-------|----------|-------|-----|----------|-------|----|---------------|-------|
| Transport and Catabolism | 4140 Regulation of autophagy          | 34  | 1.34E-03 | 26.47 | 32  | 1.95E-02 | 31.25 | 3.59E-02 | 18.75 | 39  | 8.13E-08 | 30.77 | 16 | 1.07E-03      | 25.00 |
|                          | 4810 Regulation of actin cytoskeleton | 210 | 7.61E-03 | 22.38 | 204 | 9.77E-03 | 33.33 | 2.43E-02 | 16.67 | 229 | 2.44E-08 | 32.75 |    | not available |       |
| Cell Motility            | 4110 Cell cycle                       | 111 | 1.39E-04 | 28.83 | 109 | 4.98E-06 | 42.20 | 6.02E-03 | 21.10 | 119 | 3.80E-09 | 36.97 |    | -             |       |
| Cell Growth and Death    | 4115 p53 signaling pathway            | 68  | 1.39E-03 | 27.94 | 63  | 1.12E-06 | 34.92 |          | -     | 75  | 7.69E-11 | 37.33 | 15 | 7.20E-04      | 6.67  |
|                          | 4210 Apoptosis                        | 88  | 4.61E-03 | 23.86 | 78  | 5.43E-06 | 42.31 | 1.09E-02 | 21.79 | 104 | 1.74E-10 | 31.73 | 19 | 6.06E-04      | 36.84 |
| Cell Communication       | 4510 Focal adhesion                   | 199 | 9.03E-04 | 26.13 | 190 | 3.13E-04 | 44.21 | 3.38E-03 | 24.74 | 215 | 4.04E-08 | 37.21 |    | not available |       |
|                          | 4520 Adherens junction                | 74  | 9.49E-04 | 28.38 | 75  | 1.57E-02 | 34.67 | 3.83E-03 | 25.33 | 84  | 1.17E-07 | 32.14 |    | not available |       |
|                          | 4530 Tight junction                   | 129 | 1.72E-03 | 22.48 | 127 | 1.87E-03 | 40.16 | 2.13E-02 | 21.26 | 145 | 2.15E-09 | 37.93 |    | not available |       |
|                          | 4540 Gap junction                     | 94  | 8.11E-03 | 23.40 | 92  | 1.62E-03 | 40.22 | 9.79E-04 | 31.52 | 105 | 2.40E-09 | 31.43 |    | not available |       |

## Organismal Systems

|                  |                                                |     |          |       |     |          |       |          |       |     |          |       |  |               |  |
|------------------|------------------------------------------------|-----|----------|-------|-----|----------|-------|----------|-------|-----|----------|-------|--|---------------|--|
| Immune System    | 4660 T cell receptor signaling pathway         | 94  | 5.71E-03 | 23.40 | 86  | 7.00E-03 | 45.35 | 3.53E-02 | 15.12 | 112 | 1.11E-09 | 27.68 |  | not available |  |
|                  | 4670 Leukocyte transendothelial migration      | 113 | 1.29E-02 | 17.70 | 107 | 6.69E-03 | 45.79 |          | -     | 125 | 1.25E-08 | 25.60 |  | not available |  |
|                  | 4664 Fc epsilon RI signaling pathway           | 76  | 1.87E-02 | 17.11 | 73  | 4.12E-04 | 45.21 | 1.37E-03 | 17.81 | 86  | 1.21E-10 | 30.23 |  | not available |  |
|                  | 4650 Natural killer cell mediated cytotoxicity | 130 | 2.38E-02 | 17.69 | 121 | 1.49E-03 | 42.15 | 3.19E-02 | 11.57 | 138 | 3.86E-10 | 26.09 |  | not available |  |
|                  | 4620 Toll-like receptor signaling pathway      | 101 | 3.70E-02 | 17.82 | 93  | 1.22E-02 | 45.16 | 1.62E-02 | 19.35 | 108 | 1.06E-10 | 30.56 |  | not available |  |
| Endocrine System | 4910 Insulin signaling pathway                 | 136 | 8.43E-04 | 30.88 | 135 | 3.26E-05 | 39.26 | 1.62E-03 | 29.63 | 161 | 2.36E-08 | 38.51 |  | not available |  |
|                  | 4912 GnRH signaling pathway                    | 98  | 1.05E-02 | 23.47 | 95  | 4.96E-05 | 40.00 | 7.40E-04 | 30.53 | 116 | 3.47E-10 | 32.76 |  | not available |  |
|                  | 4916 Melanogenesis                             | 99  | 1.74E-02 | 20.20 | 101 | 5.49E-03 | 30.69 | 6.92E-04 | 25.74 | 108 | 2.54E-10 | 35.19 |  | not available |  |
| Nervous System   | 4720 Long-term potentiation                    | 70  | 9.74E-03 | 25.71 | 68  | 5.89E-03 | 36.76 | 2.58E-03 | 25.00 | 85  | 2.00E-11 | 36.47 |  | not available |  |

## Human Diseases

|                   |                                                    |     |          |       |     |          |       |          |       |     |          |       |               |
|-------------------|----------------------------------------------------|-----|----------|-------|-----|----------|-------|----------|-------|-----|----------|-------|---------------|
| Cancer            | 5211 Renal cell carcinoma                          | 69  | 3.72E-05 | 34.78 | 67  | 1.85E-05 | 40.30 | 3.06E-02 | 20.90 | 74  | 2.42E-09 | 40.54 | not available |
|                   | 5216 Thyroid cancer                                | 29  | 1.65E-04 | 41.38 | 28  | 4.66E-04 | 42.86 | 1.18E-02 | 25.00 | 28  | 2.75E-04 | 35.71 | not available |
|                   | 5215 Prostate cancer                               | 90  | 2.30E-04 | 26.67 | 84  | 5.94E-03 | 45.24 | 4.69E-03 | 29.76 | 103 | 7.82E-08 | 36.89 | not available |
|                   | 5218 Melanoma                                      | 71  | 5.25E-04 | 30.99 |     | -        |       | 3.93E-02 | 19.12 | 75  | 2.88E-08 | 44.00 | not available |
|                   | 5214 Glioma                                        | 64  | 7.85E-04 | 32.81 | 62  | 1.19E-02 | 38.71 | 5.39E-03 | 24.19 | 76  | 2.20E-09 | 50.00 | not available |
|                   | 5220 Chronic myeloid leukemia                      | 74  | 8.54E-04 | 36.49 | 70  | 3.40E-05 | 32.86 | 2.81E-02 | 22.86 | 87  | 1.43E-08 | 39.08 | not available |
|                   | 5223 Non-small cell lung cancer                    | 54  | 1.16E-03 | 29.63 | 51  | 1.42E-02 | 33.33 | 3.35E-02 | 17.65 | 62  | 4.73E-09 | 43.55 | not available |
|                   | 5210 Colorectal cancer                             | 83  | 1.42E-03 | 31.33 | 81  | 2.71E-03 | 38.27 | 1.71E-02 | 20.99 | 92  | 9.70E-09 | 42.39 | not available |
|                   | 5222 Small cell lung cancer                        | 86  | 2.19E-03 | 27.91 | 78  | 2.71E-04 | 53.85 | 1.31E-02 | 25.64 | 108 | 3.74E-07 | 35.19 | not available |
|                   | 5213 Endometrial cancer                            | 52  | 2.36E-03 | 26.92 | 50  | 2.30E-03 | 40.00 | 3.81E-02 | 24.00 | 60  | 8.46E-08 | 40.00 | not available |
|                   | 5221 Acute myeloid leukemia                        | 57  | 4.54E-03 | 29.82 | 53  | 1.83E-05 | 47.17 | 2.99E-02 | 28.30 | 71  | 5.10E-07 | 30.99 | not available |
|                   | 5217 Basal cell carcinoma                          | 53  | 2.66E-02 | 18.87 | 53  | 4.26E-03 | 33.96 | 2.31E-04 | 16.98 | 54  | 1.08E-06 | 27.78 | not available |
| Immune System     | 5340 Primary immunodeficiency                      | 34  | 1.24E-02 | 14.71 |     | -        |       | 3.51E-02 | 12.50 | 36  | 2.02E-08 | 11.11 | not available |
| Neurodegenerative | 5010 Alzheimer's disease                           | 158 | 5.04E-06 | 46.84 | 151 | 6.45E-05 | 29.80 | 2.57E-03 | 21.85 | 187 | 1.00E-09 | 33.16 | not available |
|                   | 5012 Parkinson's disease                           | 113 | 1.35E-05 | 58.41 | 104 | 2.33E-03 | 27.88 | 2.11E-02 | 18.27 | 138 | 1.93E-09 | 35.51 | not available |
|                   | 5040 Huntington's disease                          | 31  | 2.93E-03 | 32.26 | 28  | 9.57E-03 | 42.86 | 5.01E-03 | 35.71 | 38  | 6.79E-08 | 36.84 | not available |
|                   | 5014 Amyotrophic lateral sclerosis (ALS)           | 55  | 6.35E-03 | 27.27 | 51  | 7.47E-05 | 37.25 | 1.04E-02 | 23.53 | 67  | 5.40E-10 | 26.87 | not available |
| Metabolic         | 4930 Type II diabetes mellitus                     | 42  | 2.49E-03 | 35.71 | 41  | 7.43E-05 | 36.59 | 2.58E-02 | 19.51 | 51  | 1.97E-09 | 33.33 | not available |
| Infectious        | 5130 Pathogenic Escherichia coli infection - EHEC  | 49  | 1.28E-03 | 38.78 | 48  | 4.76E-02 | 45.83 | 2.28E-02 | 22.92 |     | -        |       | not available |
|                   | 5110 Vibrio cholerae infection                     | 56  | 2.39E-03 | 25.00 | 57  | 5.07E-03 | 45.61 | 3.67E-03 | 28.07 |     | -        |       | not available |
|                   | 5120 Epithelial cell signaling in Helicobacter ... | 65  | 1.16E-02 | 20.00 | 62  | 1.58E-05 | 53.23 | 2.53E-02 | 29.03 |     | -        |       | not available |

eTable 2 -

A list of genes that exhibit accelerated expression trends in OPMD compared with skeletal muscle aging.

| Symbol       | Entrez IDs | Probe IDs | A | S | P | Symbol   | Entrez IDs | Probe IDs | A | S | P |
|--------------|------------|-----------|---|---|---|----------|------------|-----------|---|---|---|
| ABCA11       | 79963      | 2320403   | ■ | ■ |   | ROPN1B   | 152015     | 730521    | ■ | ■ |   |
| ACP6         | 51205      | 4670671   | ■ | ■ | ■ | SF3A3    | 10946      | 1230747   | ■ | ■ |   |
| ADAM7        | 8756       | 1260424   | ■ | ■ |   | SH2B3    | 10019      | 6560301   | ■ | ■ |   |
| ALDH3A1      | 218        | 5560369   | ■ | ■ | ■ | SLC1A4   | 6509       | 6350392   | ■ | ■ | ■ |
| ALDH6A1      | 4329       | 5820373   | ■ | ■ | ■ | SLC36A2  | 153201     | 6180711   | ■ | ■ |   |
| AP2A1        | 160        | 4390180   | ■ | ■ |   | SLC38A10 | 124565     | 6590333   | ■ | ■ |   |
| BHLHB5       | 27319      | 7210551   | ■ | ■ |   | SNHG11   | 128439     | 4560332   | ■ | ■ | ■ |
| C21ORF34     | 388815     | 70368     | ■ | ■ |   | SPCS2    | 9789       | 7040068   | ■ | ■ |   |
| C4ORF29      | 80167      | 5810192   | ■ | ■ |   | STX11    | 8676       | 60470     | ■ | ■ |   |
| CDKN1A       | 1026       | 4230201   | ■ | ■ |   | STX5     | 6811       | 6450470   | ■ | ■ |   |
| CHRNA1       | 1134       | 1410017   | ■ | ■ | ■ | TIAM2    | 26230      | 7050612   | ■ | ■ | ■ |
| CHRNA1       | 1134       | 4120717   | ■ | ■ | ■ | TMEM55B  | 90809      | 5220152   | ■ | ■ | ■ |
| CHRNA1       | 1134       | 4570634   | ■ | ■ | ■ | TRIM38   | 10475      | 3930377   | ■ | ■ |   |
| CREB5        | 9586       | 4290619   | ■ | ■ | ■ | TSC1     | 7248       | 4040373   | ■ | ■ |   |
| CTDSP1       | 58190      | 7150333   | ■ | ■ | ■ | TSPY1    | 64591      | 4250097   | ■ | ■ |   |
| DHRS12       | 79758      | 3710086   | ■ | ■ | ■ | UBQLN4   | 56893      | 2120215   | ■ | ■ | ■ |
| DNAJB6       | 10049      | 6580189   | ■ | ■ |   | UCP2     | 7351       | 6580059   | ■ | ■ | ■ |
| DUOX1        | 53905      | 3060528   | ■ | ■ |   | UNC13B   | 10497      | 5820121   | ■ | ■ | ■ |
| EEF1A1       | 1915       | 3450719   | ■ | ■ |   | UPB1     | 51733      | 3830735   | ■ | ■ | ■ |
| EGFLAM       | 133584     | 7380092   | ■ | ■ |   | VAMP1    | 6843       | 2350541   | ■ | ■ |   |
| EMX1         | 2016       | 3460390   | ■ | ■ | ■ | WDR20    | 91833      | 3130494   | ■ | ■ |   |
| FRAS1        | 80144      | 270358    | ■ | ■ | ■ | ZCCHC11  | 23318      | 4260093   | ■ | ■ | ■ |
| GRM2         | 2912       | 4230673   | ■ | ■ |   | ZNF679   | 168417     | 3940431   | ■ | ■ |   |
| H2AFX        | 3014       | 4120538   | ■ | ■ |   |          |            |           |   |   |   |
| HPS4         | 89781      | 3170504   | ■ | ■ |   |          |            |           |   |   |   |
| IARS         | 3376       | 6420397   | ■ | ■ |   |          |            |           |   |   |   |
| IGF2BP3      | 10643      | 1770243   | ■ | ■ | ■ |          |            |           |   |   |   |
| JARID2       | 3720       | 2320286   | ■ | ■ | ■ |          |            |           |   |   |   |
| LMOD1        | 25802      | 6760246   | ■ | ■ | ■ |          |            |           |   |   |   |
| LOC100131174 | 100131174  | 4670482   | ■ | ■ |   |          |            |           |   |   |   |
| LOC400793    | 400793     | 5090142   | ■ | ■ |   |          |            |           |   |   |   |
| LOC402251    | 402251     | 3440670   | ■ | ■ |   |          |            |           |   |   |   |
| LOC642795    | 642795     | 6100068   | ■ | ■ |   |          |            |           |   |   |   |
| LOC644284    | 644284     | 2490451   | ■ | ■ |   |          |            |           |   |   |   |
| LOC649260    | 649260     | 770348    | ■ | ■ |   |          |            |           |   |   |   |
| LRTM2        | 654429     | 5890243   | ■ | ■ | ■ |          |            |           |   |   |   |
| MAP2K3       | 5606       | 4200544   | ■ | ■ |   |          |            |           |   |   |   |
| METTL10      | 399818     | 6370075   | ■ | ■ |   |          |            |           |   |   |   |
| MUTYH        | 4595       | 5670037   | ■ | ■ |   |          |            |           |   |   |   |
| NEK3         | 4752       | 1190504   | ■ | ■ |   |          |            |           |   |   |   |
| NFYA         | 4800       | 6180072   | ■ | ■ |   |          |            |           |   |   |   |
| OSBP         | 5007       | 5550296   | ■ | ■ |   |          |            |           |   |   |   |
| PDDC1        | 347862     | 3420730   | ■ | ■ | ■ |          |            |           |   |   |   |
| PHF19        | 26147      | 5550402   | ■ | ■ |   |          |            |           |   |   |   |
| POU5F1       | 5460       | 5550577   | ■ | ■ |   |          |            |           |   |   |   |
| PRODH        | 5625       | 5860689   | ■ | ■ | ■ |          |            |           |   |   |   |
| PRRX1        | 5396       | 1440601   | ■ | ■ | ■ |          |            |           |   |   |   |
| RAPGEFL1     | 51195      | 1940072   | ■ | ■ | ■ |          |            |           |   |   |   |
| RCC1         | 1104       | 2570292   | ■ | ■ |   |          |            |           |   |   |   |
| RDH5         | 5959       | 110326    | ■ | ■ |   |          |            |           |   |   |   |
| RFPL3S       | 10737      | 1240731   | ■ | ■ |   |          |            |           |   |   |   |

A: Aging

S: Symptomatic

P: Pre-symptomatic

Yellow: Up-regulation

Blue: Down-regulation

**Supplementary Table 4** – A primer list for qPCR.

| <b>Gene</b> | <b>FW Primer</b>        | <b>RV Primer</b>         |
|-------------|-------------------------|--------------------------|
| GUSB        | 5' CTCATTGGAATTTGCCGATT | 5' CCGAGTGAAGATCCCCTTTTA |
| GapDH       | 5' CAACGAATTGGCTACAGCA  | 5' AGGGGTCTACATGGCAACTG  |
| PABPN1      | 5' CGTTGGCAATGTGGACTATG | 5' ACACGGTTGACTGAACCACA  |
| MYH1        | 5' TGGACAACTGCAAGCAAAG  | 5' GACCTGGGACTCAGCAATGT  |
| CAV3        | 5' CTGTTGCCTGAGCACAAAAA | 5' GTTAGCAAAGGGGAGGTTTC  |
